# Supplementary material for: Type 2 diabetes mellitus is associated with an imbalance in circulating endothelial and smooth muscle progenitor cell numbers
Source: PubMed Central journal article supplement (PMC3411291; doi:10.1007/s00125-012-2590-5), 2012-06-01
Supplement: 125_2012_2590_MOESM4_ESM.pdf [file 125_2012_2590_MOESM4_ESM.pdf]

**ESM Table 3**

**Table 3. Gene expression of SMC and EC lineage genes in cultured SMCs.**

| Gene name     | Type 2 diabetes without MVD | Type 2 diabetes with PAD  | Type 2 diabetes with CAD  | Healthy control          | Non-type 2 diabetes with PAD | Non-Type 2 diabetes with CAD | p-value |
|---------------|-----------------------------|---------------------------|---------------------------|--------------------------|------------------------------|------------------------------|---------|
| <b>SMC</b>    |                             |                           |                           |                          |                              |                              |         |
| <i>ACTA2</i>  | 1.0 ± 0.1 <sup>a</sup>      | 0.9 ± 0.2                 | 0.4 ± 0.1 Δ               | 1.0 ± 0.2 Δ              | 0.6 ± 0.1                    | 0.9 ± 0.3                    | <0.05   |
| <i>MYH11</i>  | 2.7 ± 1.0                   | 0.8 ± 0.2                 | 0.7 ± 0.2 Δ               | 1.0 ± 0.5 Δ              | 0.6 ± 0.2 Δ                  | 1.3 ± 0.4 Δ                  | NS      |
| <i>SMT</i>    | 1.5 ± 0.3                   | 1.0 ± 0.1                 | 1.2 ± 0.3                 | 1.0 ± 0.2 Δ              | 1.4 ± 0.3                    | 0.9 ± 0.2                    | NS      |
| <i>SRF</i>    | 1.2 ± 0.2                   | 1.0 ± 0.01 Δ              | 1.2 ± 0.1 Δ               | 1.0 ± 0.3                | 1.3 ± 0.7                    | 1.3 ± 0.2                    | NS      |
| <i>KLF4</i>   | 0.8 ± 0.1                   | 0.6 ± 0.1                 | 0.7 ± 0.1 Δ               | 1.0 ± 0.2                | 0.5 ± 0.1 Δ                  | 1.0 ± 0.2                    | NS      |
| <i>SMAD4</i>  | 1.0 ± 0.1                   | 0.8 ± 0.1                 | 0.9 ± 0.02 Δ              | 1.0 ± 0.2 Δ              | 0.8 ± 0.05 Δ                 | 0.8 ± 0.03                   | NS      |
| <i>TGFB1</i>  | 0.8 ± 0.1                   | 0.9 ± 0.1                 | 1.1 ± 0.1                 | 1.0 ± 0.2 Δ              | 0.8 ± 0.1 Δ                  | 0.8 ± 0.1                    | NS      |
| <i>TGFB1</i>  | 0.6 ± 0.1                   | 0.6 ± 0.05 Δ <sup>b</sup> | 0.9 ± 0.1 Δ               | 1.0 ± 0.2 Δ              | 0.9 ± 0.2                    | 1.0 ± 0.2                    | <0.05   |
| <i>TGFB2</i>  | 0.5 ± 0.1 <sup>c</sup>      | 0.6 ± 0.03                | 0.8 ± 0.03 Δ <sup>d</sup> | 1.0 ± 0.2                | 0.8 ± 0.1                    | 0.6 ± 0.1                    | <0.05   |
| <i>BMP6</i>   | 1.0 ± 0.3 Δ                 | 1.9 ± 0.4 <sup>e</sup>    | 0.7 ± 0.8                 | 1.0 ± 0.2 Δ <sup>f</sup> | 1.0 ± 0.2                    | 0.4 ± 0.1 Δ                  | <0.05   |
| <i>PDGFBB</i> | 0.6 ± 0.1 Δ                 | 1.2 ± 0.3                 | 1.2 ± 0.2 Δ               | 1.0 ± 0.2 Δ              | 1.5 ± 0.3 <sup>g</sup>       | 0.8 ± 0.1                    | <0.05   |
| <i>COL1A1</i> | 0.5 ± 0.2                   | 0.3 ± 0.1 Δ               | 0.9 ± 0.3                 | 1.0 ± 0.3                | 0.4 ± 0.2                    | 0.8 ± 0.3                    | NS      |
| <b>EC</b>     |                             |                           |                           |                          |                              |                              |         |
| <i>KDR</i>    | 0.3 ± 0.1 <sup>h</sup>      | 1.5 ± 0.4                 | 0.8 ± 0.2                 | 1.0 ± 0.4                | 1.4 ± 0.5                    | 1.1 ± 0.5                    | <0.05   |
| <i>VEGFA</i>  | 1.2 ± 0.2 <sup>i</sup>      | 0.7 ± 0.1                 | 1.0 ± 0.1                 | 1.0 ± 0.2 Δ              | 0.8 ± 0.2                    | 1.4 ± 0.3                    | <0.05   |
| <i>NOS3</i>   | 0.5 ± 0.1 <sup>j</sup>      | 0.3 ± 0.05                | 0.5 ± 0.1 Δ               | 1.0 ± 0.1 Δ              | 0.7 ± 0.3                    | 0.7 ± 0.2                    | <0.05   |
| <i>PECAMI</i> | 0.5 ± 0.1 Δ <sup>k</sup>    | 0.8 ± 0.1 <sup>l</sup>    | 1.0 ± 0.04 Δ <sup>m</sup> | 1.0 ± 0.2 Δ              | 0.8 ± 0.2                    | 1.0 ± 0.2                    | <0.05   |

Data are expressed as relative mRNA expression +/- SEM compared to the healthy control group. N=6 per group unless indicated by Δ (N=5). *ACTA2*, α-Smooth muscle actin; *MYH11*, Smooth muscle myosin heavy chain; *SMT*, Smoothelin, *SRF*, Serum response factor; *KLF4*, Krüppel-like factor 4; *SMAD4*, Mothers against decapentaplegic homolog 4; *TGFB1*, Transforming growth factor-β; *TGFB1*, Transforming growth factor-β receptor 1; *TGFB2*, Transforming growth factor-β receptor 2; *BMP6*, Bone-morphogenetic protein 6; *PDGFBB*, Platelet-derived growth factor-bb; *COL1A1*; Collagen type 1, α1; *KDR*, Kinase domain receptor; *VEGFA*, Vascular endothelial growth factor A; *NOS3*, Endothelial nitric oxide synthase; *PECAMI*; Platelet endothelial cell adhesion molecule 1

Statistically significant with ANOVA compared to:

<sup>a</sup>T2DM no MVD vs. T2DM with CAD

<sup>b</sup>T2DM with PAD vs. T2DM with CAD

<sup>c</sup>T2DM no MVD vs. Healthy control

<sup>d</sup>T2DM no MVD vs. T2DM with CAD

<sup>e</sup>T2DM with PAD vs. T2DM with CAD

<sup>f</sup>Healthy control vs. non-T2DM with CAD

<sup>g</sup>non-T2DM with PAD vs. non-T2DM with CAD

<sup>h</sup>T2DM no MVD vs. T2DM with PAD

<sup>i</sup>T2DM no MVD vs. T2DM with PAD

<sup>j</sup>T2DM no MVD vs. Healthy control

<sup>k</sup>T2DM no MVD vs. Healthy control

<sup>l</sup>T2DM no MVD vs. T2DM with CAD

<sup>m</sup>T2DM with CAD vs. T2DM with PAD
