# Supplementary material for: Type 2 diabetes mellitus is associated with an imbalance in circulating endothelial and smooth muscle progenitor cell numbers
Source: Springer Nature journal article supplement (doi:10.1007/s00125-012-2590-5), 2012-05-30
Supplement: MOESM2 [file 8090912]

**ESM Table 1**

**Table 1.** CAC and SMPC levels *in vitro* expressed as  $10^3$  cells per  $10^6$  WBC and per mL blood.

|             |                         | Non-Type 2 diabetes |                          |              |                           |              | Type 2 diabetes |                         |              |              |              |
|-------------|-------------------------|---------------------|--------------------------|--------------|---------------------------|--------------|-----------------|-------------------------|--------------|--------------|--------------|
|             |                         | all                 | no MVD                   | MVD          | PAD                       | CAD          | all             | no MVD                  | MVD          | PAD          | CAD          |
| n           |                         | 24                  | 7                        | 17           | 10                        | 7            | 26              | 7                       | 19           | 10           | 9            |
| <b>CAC</b>  | x $10^3$ per $10^6$ WBC | 10.5 ± 1.4          | 11.3 ± 2.0               | 10.2 ± 1.8   | 13.3 ± 2.6                | 5.7 ± 1.5    | 8.3 ± 0.9       | 11.2 ± 1.9 <sup>a</sup> | 7.0 ± 0.9    | 5.9 ± 0.9    | 8.6 ± 1.6    |
|             | x $10^3$ per mL blood   | 77.8 ± 14.1         | 60.3 ± 11.9              | 84.9 ± 19.3  | 120.0 ± 27.8 <sup>b</sup> | 35.0 ± 7.2   | 61.0 ± 6.2      | 78.6 ± 13.2             | 54.6 ± 6.6   | 49.7 ± 9.2   | 55.7 ± 10.6  |
| <b>SMPC</b> | x $10^3$ per $10^6$ WBC | 33.3 ± 4.2          | 17.2 ± 3.3 <sup>c</sup>  | 39.9 ± 5.0   | 44.7 ± 6.9                | 33.0 ± 6.8   | 29.9 ± 2.7      | 29.3 ± 4.9              | 30.2 ± 3.3   | 32.2 ± 4.9   | 28.0 ± 4.6   |
|             | x $10^3$ per mL blood   | 250.0 ± 44.1        | 94.1 ± 20.8 <sup>d</sup> | 318.8 ± 57.2 | 407.8 ± 83.4              | 191.6 ± 41.5 | 232.2 ± 32.0    | 235.3 ± 85.7            | 231.2 ± 33.9 | 275.8 ± 56.7 | 181.7 ± 29.7 |

Data presented as mean ± SEM.

Statistically significant with ANOVA compared to:

<sup>a</sup>T2DM no MVD compared to T2DM with MVD (p<0.05)

<sup>b</sup>Non-T2DM with PAD compared to non-T2DM with CAD (p<0.05)

<sup>c</sup>Healthy compared with T2DM, non-T2DM with MVD and non-T2DM with PAD (p<0.05).

<sup>d</sup>Healthy compared with T2DM (p<0.05), non-T2DM with MVD (p<0.05) and non-T2DM with PAD (p<0.01)
