# Supplementary material for: Type 2 diabetes mellitus is associated with an imbalance in circulating endothelial and smooth muscle progenitor cell numbers
Source: Springer Nature journal article supplement (doi:10.1007/s00125-012-2590-5), 2012-05-30
Supplement: MOESM3 [file 8090912]

**ESM Table 2**

**Table 2. Gene expression of SMC and EC lineage genes in cultured CACs.**

| Gene           | Type 2 diabetes without MVD | Type 2 diabetes with PAD | Type 2 diabetes with CAD | Healthy control | Non-type 2 diabetes with PAD | Non-type 2 diabetes with CAD | p-value |
|----------------|-----------------------------|--------------------------|--------------------------|-----------------|------------------------------|------------------------------|---------|
| <b>SMC</b>     |                             |                          |                          |                 |                              |                              |         |
| <i>ACTA2</i>   | 1.4 ± 0.4                   | 0.8 ± 0.1 Δ              | 0.6 ± 0.1 Δ              | 1.0 ± 0.3       | 0.4 ± 0.2                    | 0.7 ± 0.2 Δ                  | NS      |
| <i>SMT</i>     | 2.0 ± 0.6                   | 1.9 ± 0.6                | 1.6 ± 0.4                | 1.0 ± 0.2       | 1.1 ± 0.3                    | 1.6 ± 0.3                    | NS      |
| <i>SRF</i>     | 1.1 ± 0.2                   | 1.0 ± 0.1                | 1.0 ± 0.6                | 1.0 ± 0.1       | 0.8 ± 0.1                    | 1.1 ± 0.2                    | NS      |
| <i>KLF4</i>    | 1.4 ± 0.4                   | 1.2 ± 0.2                | 1.7 ± 0.6                | 1.0 ± 0.2       | 0.9 ± 0.2                    | 0.9 ± 0.2                    | NS      |
| <i>SMAD4</i>   | 1.5 ± 0.2                   | 1.1 ± 0.1                | 1.1 ± 0.1                | 1.0 ± 0.04      | 0.9 ± 0.04 <sup>a</sup>      | 1.0 ± 0.03                   | <0.05   |
| <i>TGFB1</i>   | 1.3 ± 0.2                   | 1.3 ± 0.1                | 1.7 ± 0.2                | 1.0 ± 0.1       | 1.0 ± 0.1                    | 1.1 ± 0.04 Δ                 | NS      |
| <i>TGFBRI</i>  | 1.5 ± 0.4                   | 1.1 ± 0.1                | 1.1 ± 0.2                | 1.0 ± 0.1       | 1.0 ± 0.1                    | 1.1 ± 0.2                    | NS      |
| <i>TGFBRI2</i> | 1.3 ± 0.2                   | 0.9 ± 0.1                | 1.0 ± 0.1                | 1.0 ± 0.1       | 0.8 ± 0.1                    | 1.1 ± 0.1                    | NS      |
| <i>BMP4</i>    | 1.1 ± 0.4                   | 0.5 ± 0.1                | 0.3 ± 0.1                | 1.0 ± 0.3       | 0.4 ± 0.1                    | 0.5 ± 0.1                    | NS      |
| <i>BMP6</i>    | 3.4 ± 1.3                   | 5.9 ± 1.4 <sup>b</sup>   | 0.7 ± 0.4 Δ              | 1.0 ± 0.4       | 1.3 ± 0.4                    | 4.0 ± 1.8                    | <0.05   |
| <i>PDGFBB</i>  | 1.7 ± 0.3                   | 1.4 ± 0.3                | 1.0 ± 0.3                | 1.0 ± 0.2       | 1.2 ± 0.1                    | 1.2 ± 0.2                    | NS      |
| <b>EC</b>      |                             |                          |                          |                 |                              |                              |         |
| <i>KDR</i>     | 0.5 ± 0.2 Δ                 | 0.2 ± 0.1                | 0.5 ± 0.2                | 1.0 ± 0.4       | 0.3 ± 0.1                    | 0.3 ± 0.2                    | NS      |
| <i>VEGFA</i>   | 0.9 ± 0.2 Δ                 | 1.1 ± 0.1                | 1.3 ± 0.2                | 1.0 ± 0.2       | 1.2 ± 0.3                    | 1.5 ± 0.4                    | NS      |
| <i>NOS3</i>    | 0.8 ± 0.3 Δ                 | 1.4 ± 0.5                | 0.4 ± 0.1 Δ              | 1.0 ± 0.3       | 0.8 ± 0.2 Δ                  | 1.1 ± 0.2                    | NS      |
| <i>CDH5</i>    | 2.9 ± 1.0                   | 8.3 ± 3.6                | 1.5 ± 0.6 Δ              | 1.0 ± 0.5       | 1.6 ± 0.4                    | 1.4 ± 0.7                    | NS      |
| <i>PECAMI</i>  | 2.0 ± 0.7                   | 1.0 ± 0.1                | 1.0 ± 0.1                | 1.0 ± 0.1       | 0.9 ± 0.1                    | 1.1 ± 0.1                    | NS      |

Data are expressed as relative mRNA expression +/- SEM compared to the healthy control group. N=6 per group unless indicated by Δ (N=5). *ACTA2*, α-Smooth muscle actin; *SMT*, Smoothelin, *SRF*, Serum response factor; *KLF4*, Krüppel-like factor 4; *SMAD4*; Mothers against decapentaplegic homolog 4; *TGFB1*, Transforming growth factor-β; *TGFBRI*, Transforming growth factor-β receptor 1; *TGFBRI2*, Transforming growth factor-β receptor 2; *BMP4*, Bone-morphogenetic protein 4; *BMP6*, Bone-morphogenetic protein 6; *PDGFBB*, Platelet-derived growth factor-bb; *KDR*, Kinase domain receptor; *VEGFA*, Vascular endothelial growth factor A; *NOS3*, Endothelial nitric oxide synthase; *CDH5*, *Vascular endothelial cadherin*; *PECAMI*; Platelet endothelial cell adhesion molecule 1

Statistically significant with ANOVA compared to:

<sup>a</sup>non-T2DM with PAD vs. non-T2DM with CAD

<sup>b</sup>T2DM with PAD vs. T2DM with CAD.
